# Supplementary material for: Beyond the medals: a cross-sectional study exploring retired elite female athletes’ health
Source: HighWire-hosted journal article supplement (doi:10.1136/bmjsem-2022-001479), 2023-01-01
Supplement: bmjsem-2022-001479supp002_data_supplement.pdf [file bmjsem-2022-001479supp002_data_supplement.pdf]

**Table S2: Birth metrics including gestational age and birthweight reported by respondents for each child**

|                          | N  | Mean | SD  | Range  |
|--------------------------|----|------|-----|--------|
| Gestational age (months) | 37 | 9    | 0.6 | 7 – 10 |
| Birthweight (kilograms)  | 31 | 3    | 0.7 | 2 – 5  |
